# Supplementary material
Source: Springer Nature journal article supplement (https://www.springermedizin.de/resource/supplementary/12943_2005_144_MOESM4_ESM.pdf/9553540)

**A**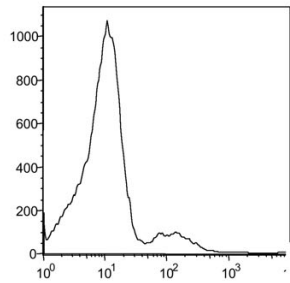

↑  
IgD

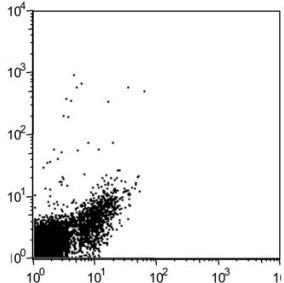

↑  
IgD

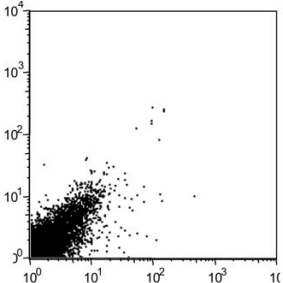

↑  
B220

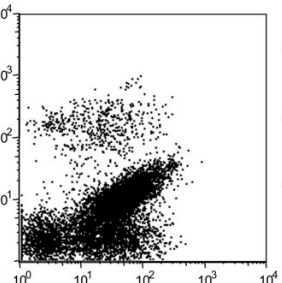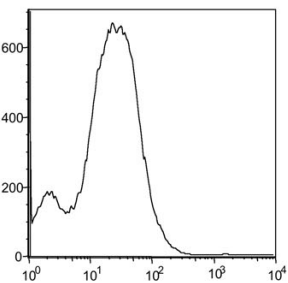**B**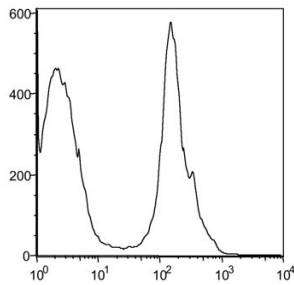

↑  
IgM

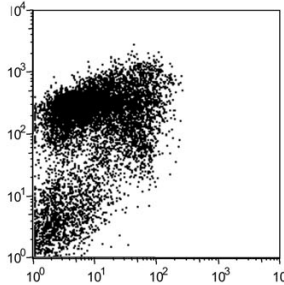

↑  
IgM

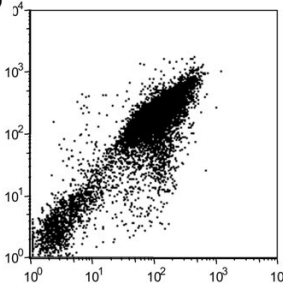

↑  
Light chain

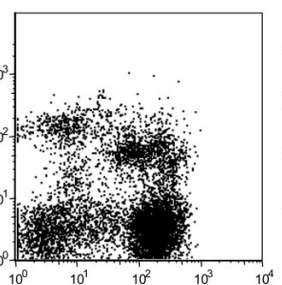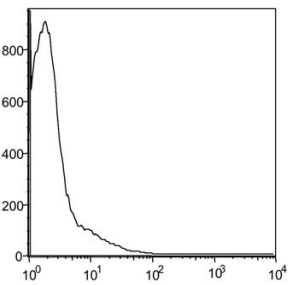

— B220 —→  
(Spl)

— IgM —→  
(Spl)

— Light chain —→  
(Spl)

— CD43 —→  
(BM)

— CD69 —→  
(Spl)

Supplement: MOESM4 [file 9553540]
